# Supplementary material
Source: ML conference proceedings conference paper supplement (https://openreview.net/forum?id=ol78tbpqyu)

Abuse030\_x264.mp4

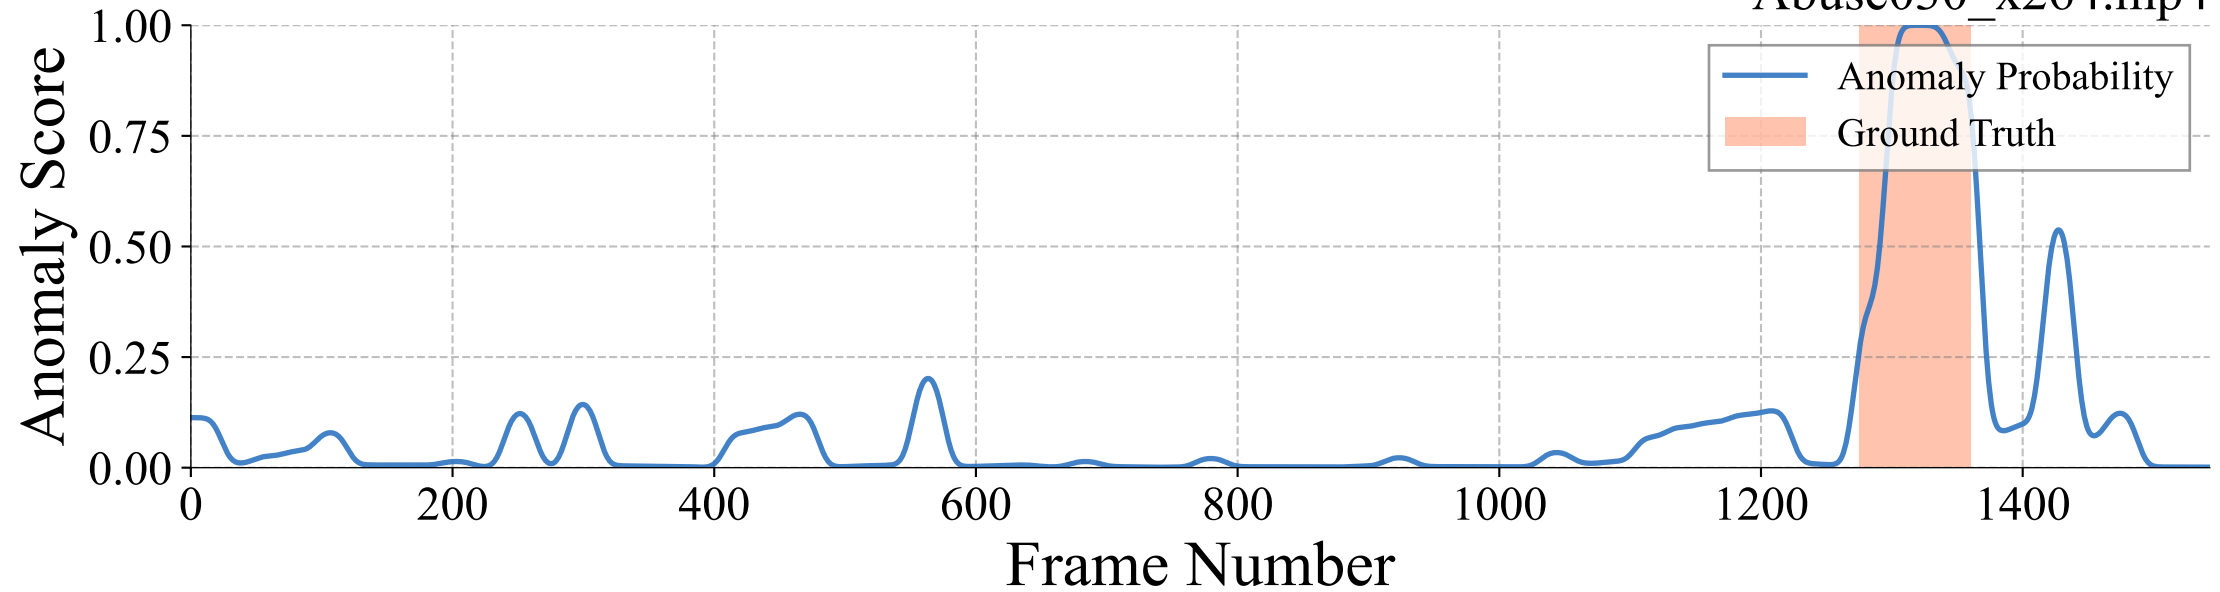

Supplement: supplementary_material [file Abuse030_x264_probability_visualization.pdf › figures/Abuse030_x264_probability_visualization.pdf]

Arrest024\_x264.mp4

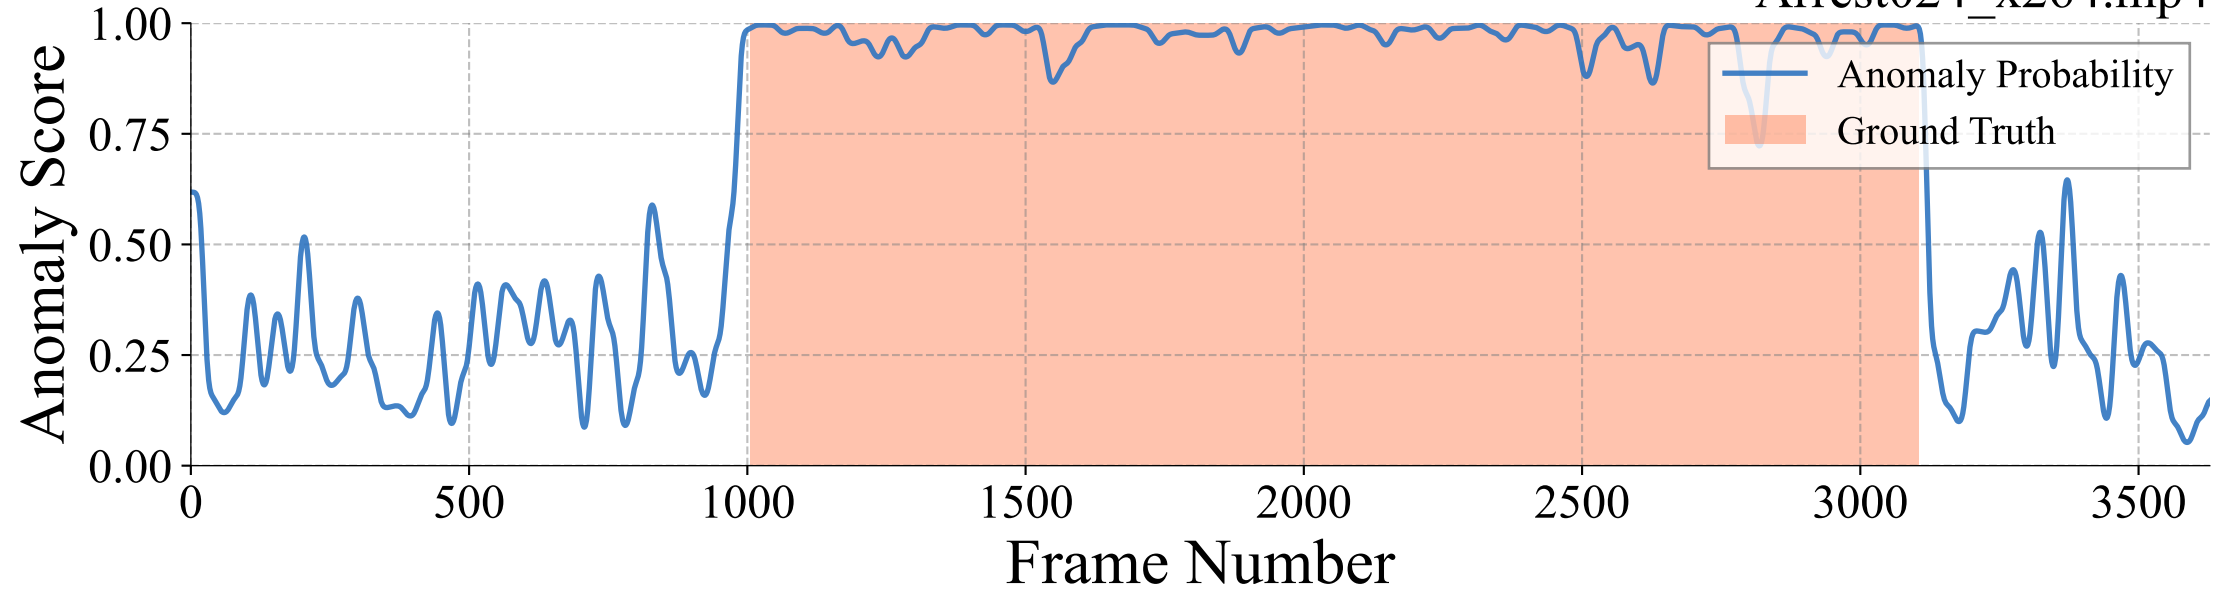

Supplement: supplementary_material [file Arrest024_x264_probability_visualization.pdf › figures/Arrest024_x264_probability_visualization.pdf]

Arson035\_x264.mp4

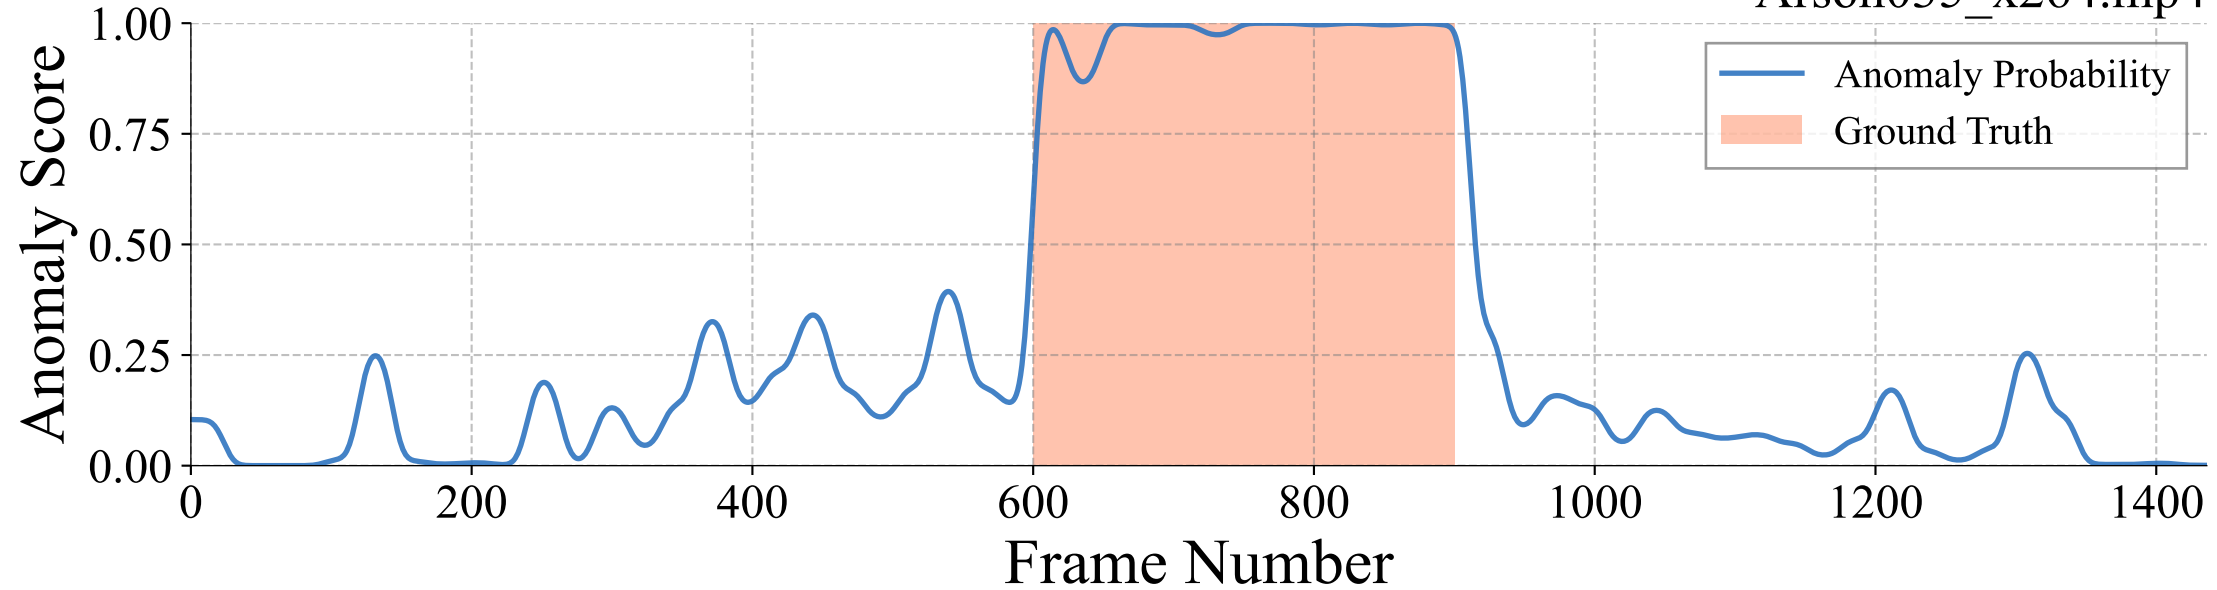

Supplement: supplementary_material [file Arson035_x264_probability_visualization.pdf › figures/Arson035_x264_probability_visualization.pdf]

Assault006\_x264.mp4

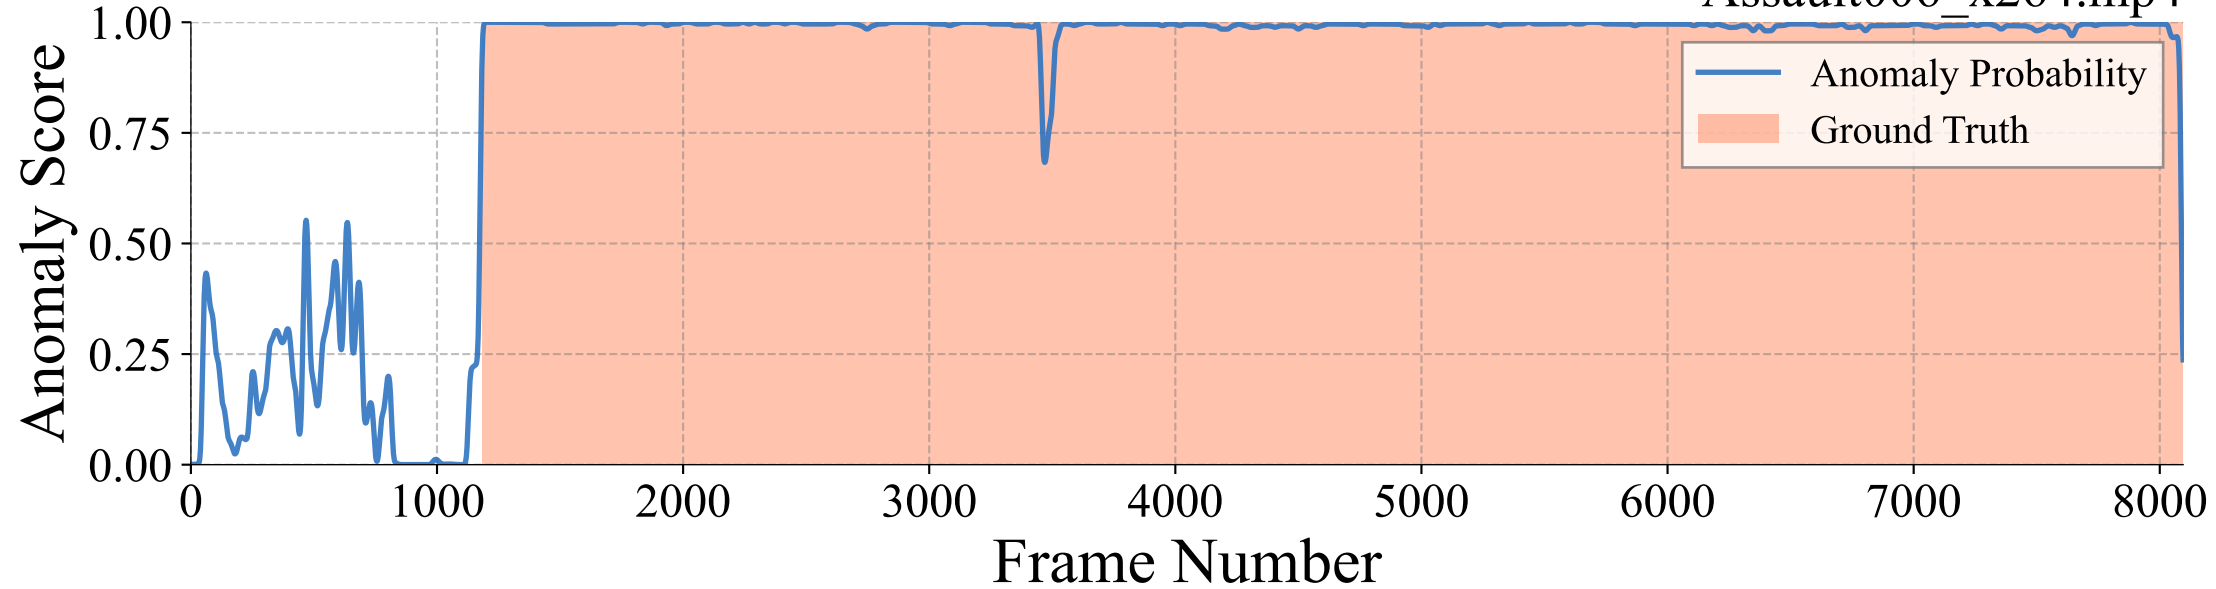

Supplement: supplementary_material [file Assault006_x264_probability_visualization.pdf › figures/Assault006_x264_probability_visualization.pdf]

Burglary033\_x264.mp4

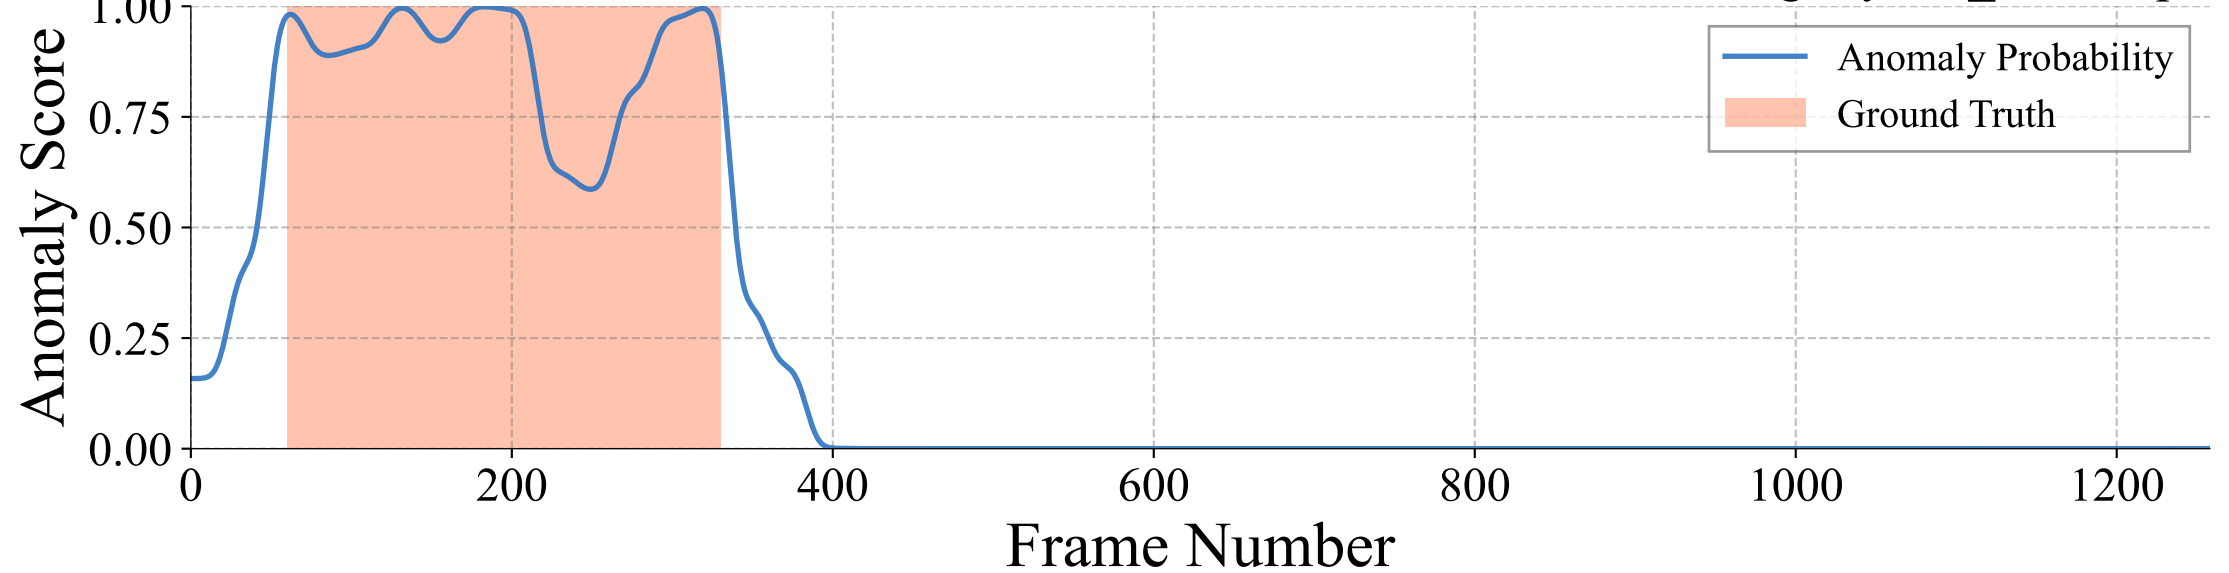

Supplement: supplementary_material [file Burglary033_x264_probability_visualization.pdf › figures/Burglary033_x264_probability_visualization.pdf]

Explosion021\_x264.mp4

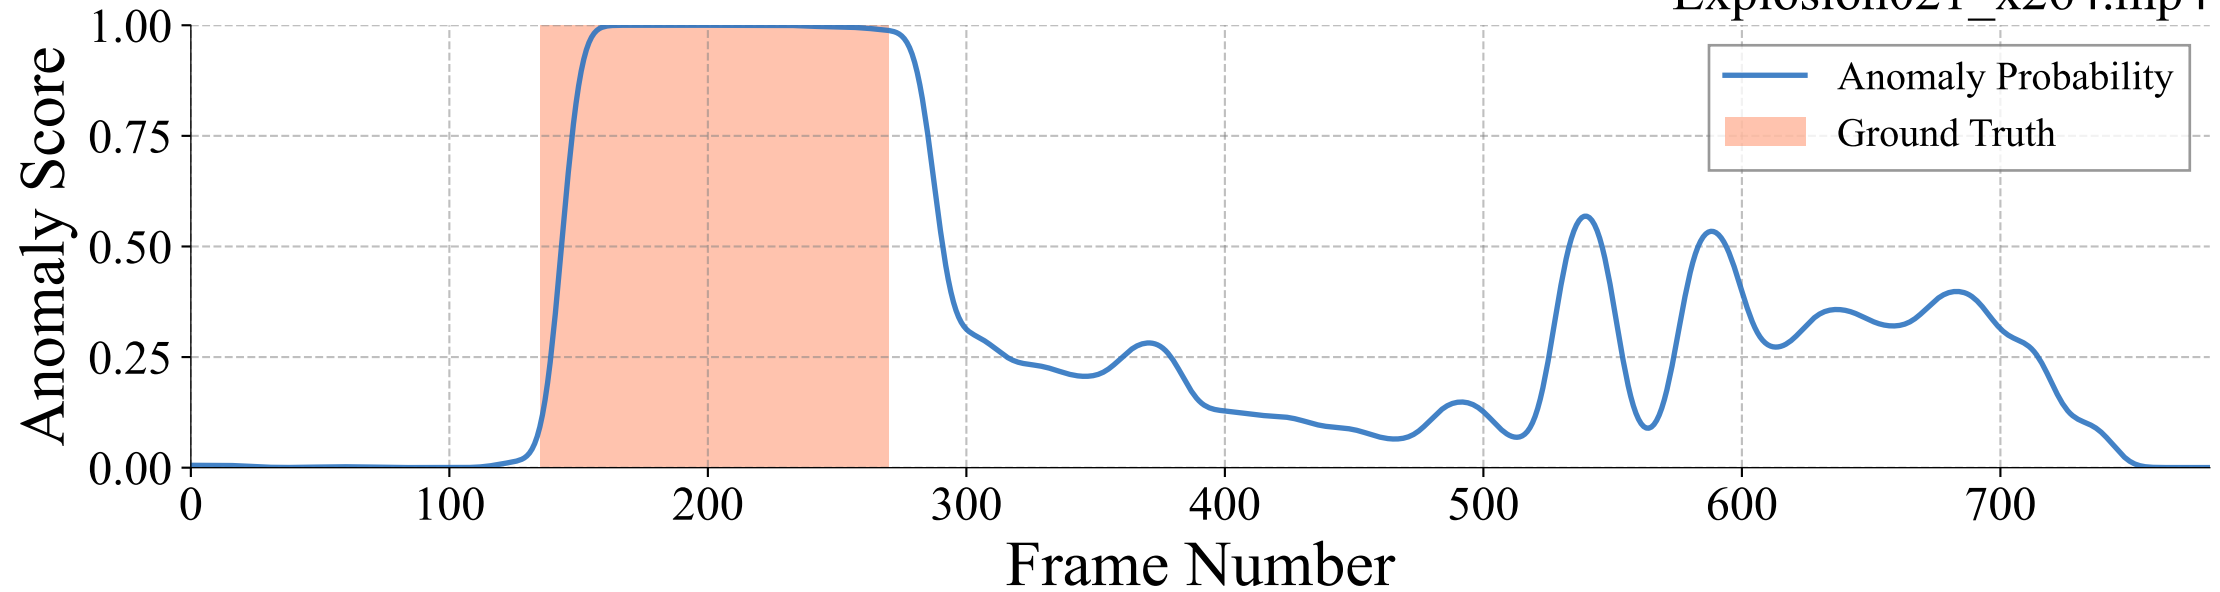

Supplement: supplementary_material [file Explosion021_x264_probability_visualization.pdf › figures/Explosion021_x264_probability_visualization.pdf]

Explosion039\_x264.mp4

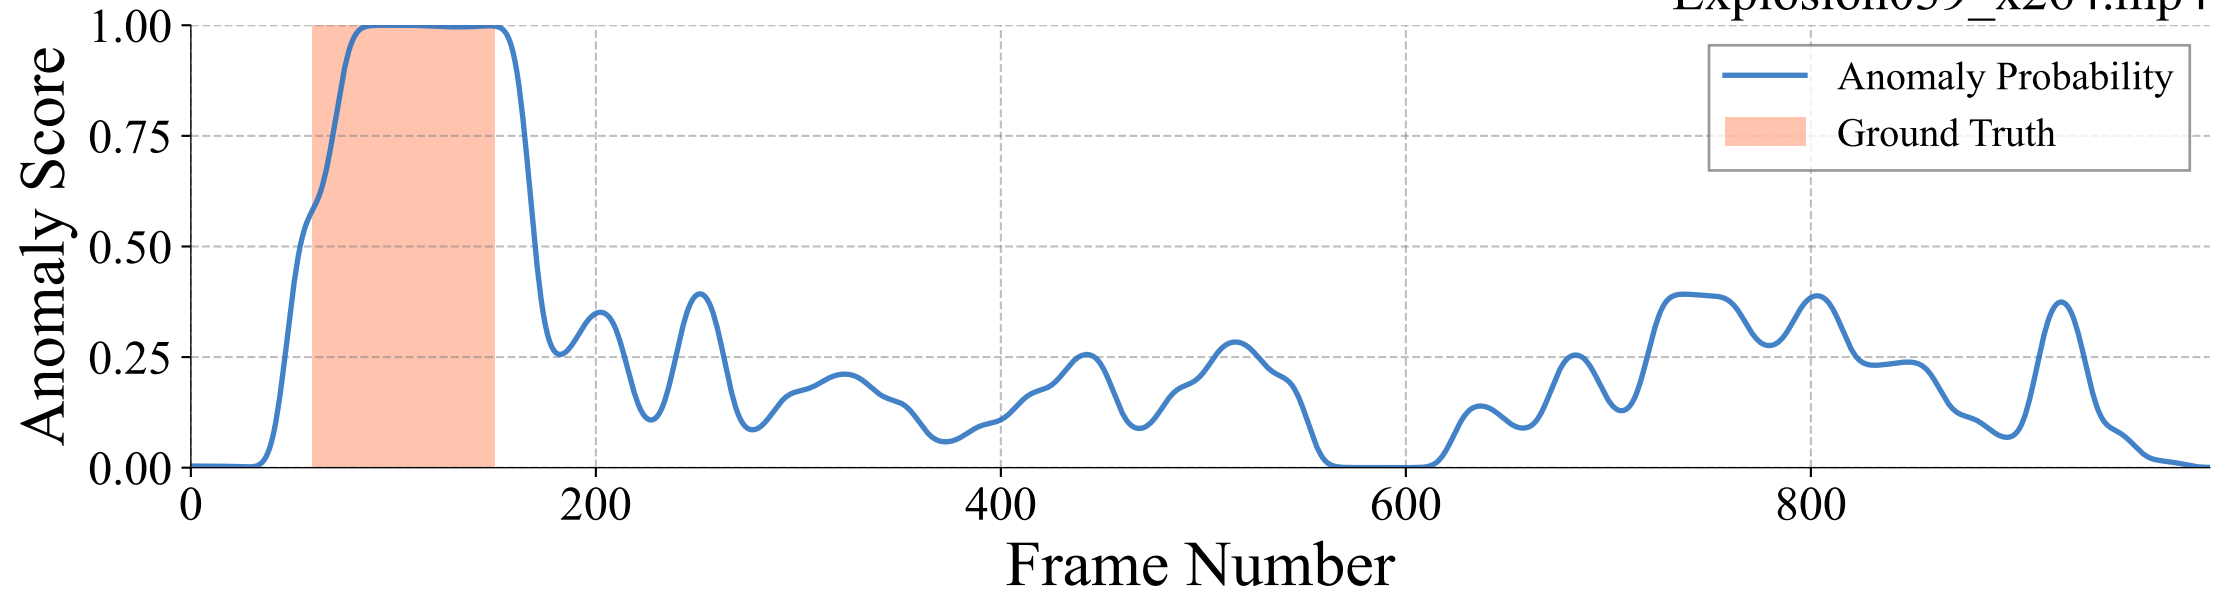

Supplement: supplementary_material [file Explosion039_x264_probability_visualization.pdf › figures/Explosion039_x264_probability_visualization.pdf]

Fighting033\_x264.mp4

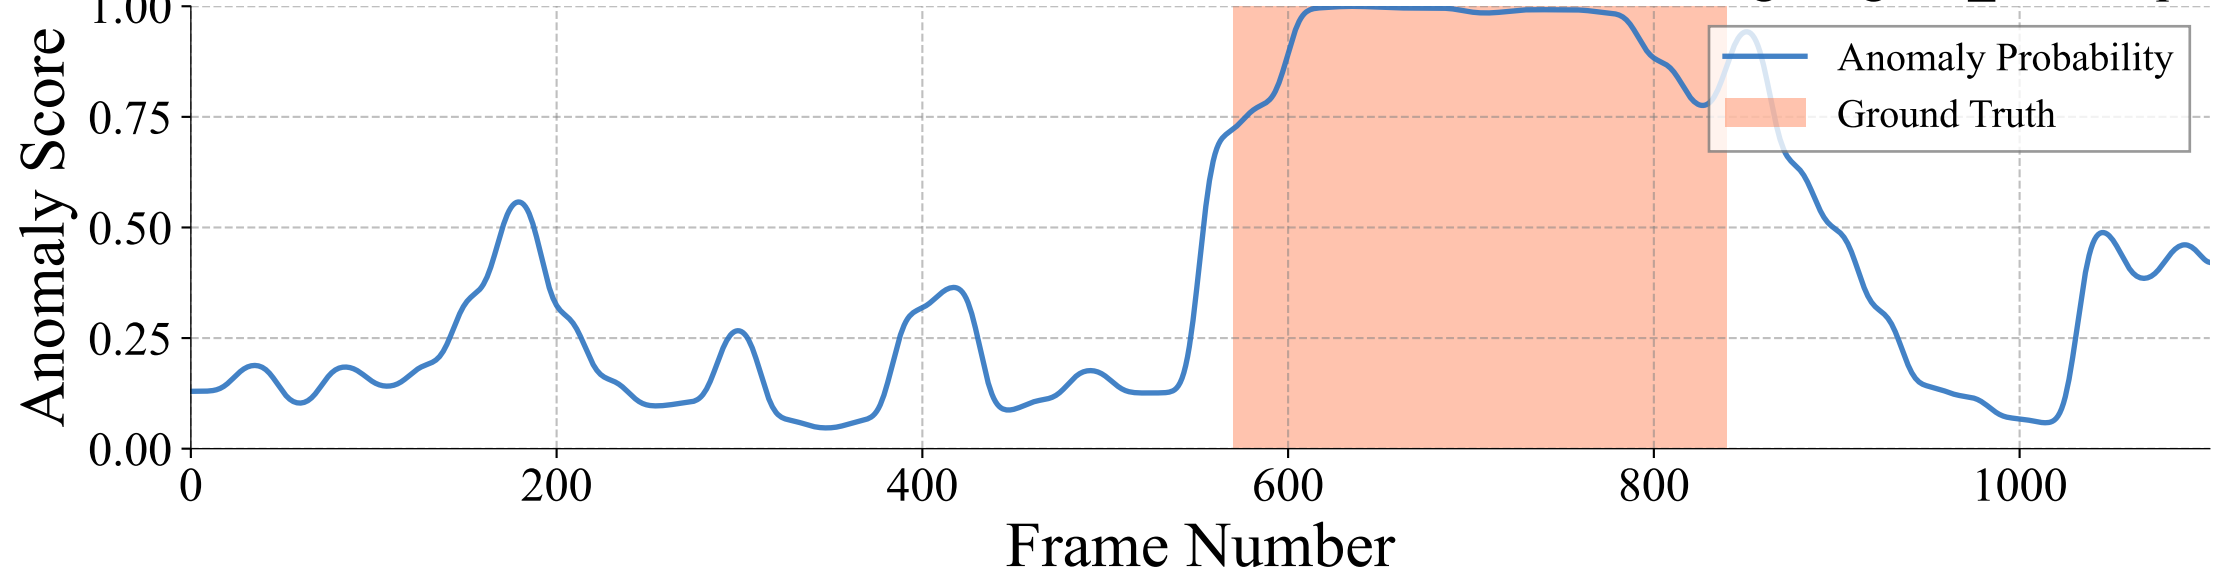

Supplement: supplementary_material [file Fighting033_x264_probability_visualization.pdf › figures/Fighting033_x264_probability_visualization.pdf]

Normal\_Videos\_189\_x264.mp4

Anomaly Score

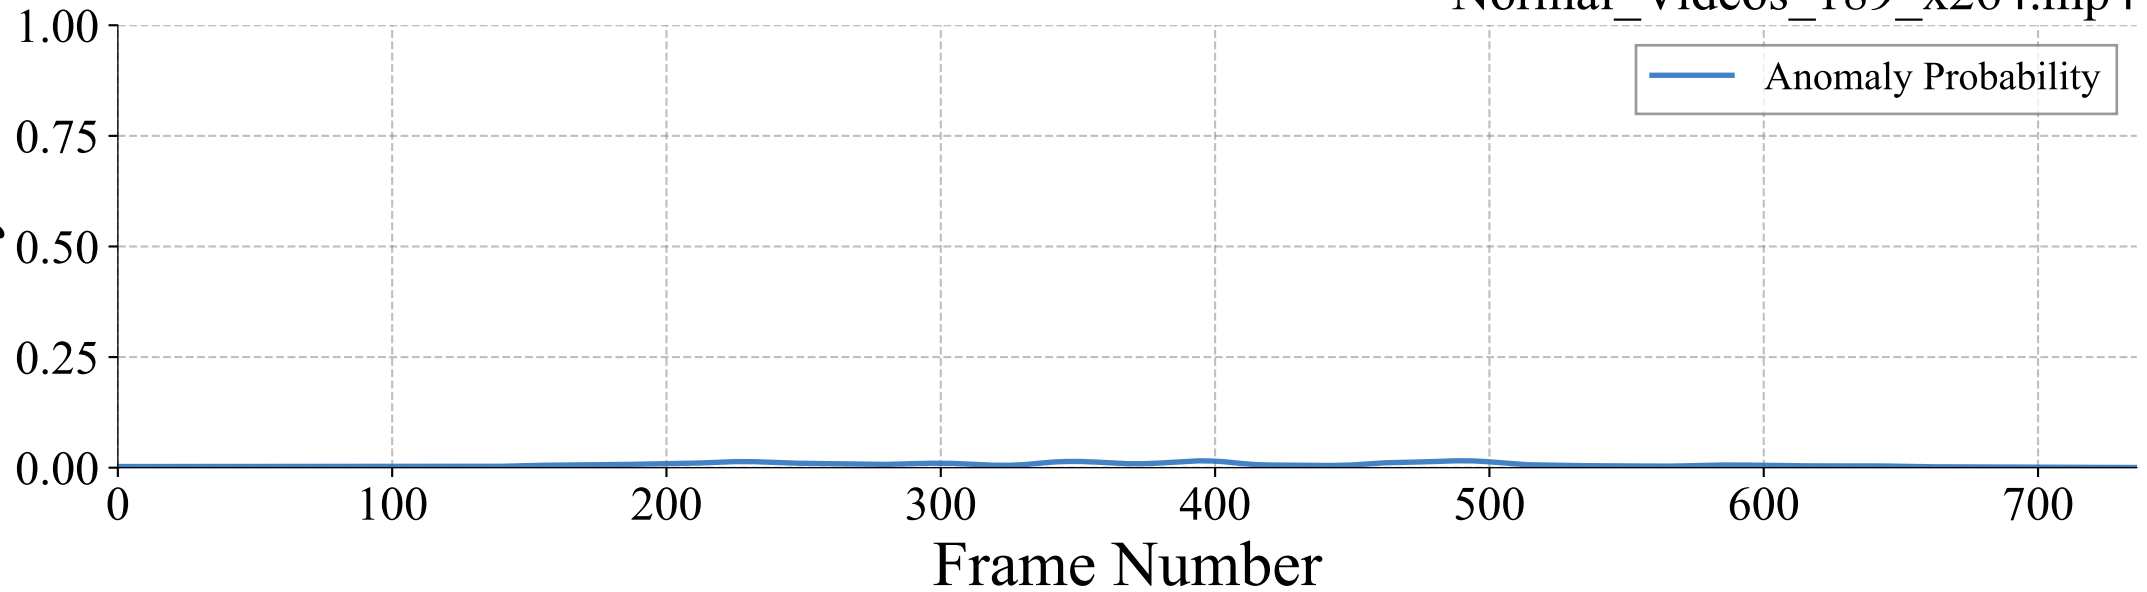

Supplement: supplementary_material [file Normal_Videos_189_x264_probability_visualization.pdf › figures/Normal_Videos_189_x264_probability_visualization.pdf]

Normal\_Videos\_210\_x264.mp4

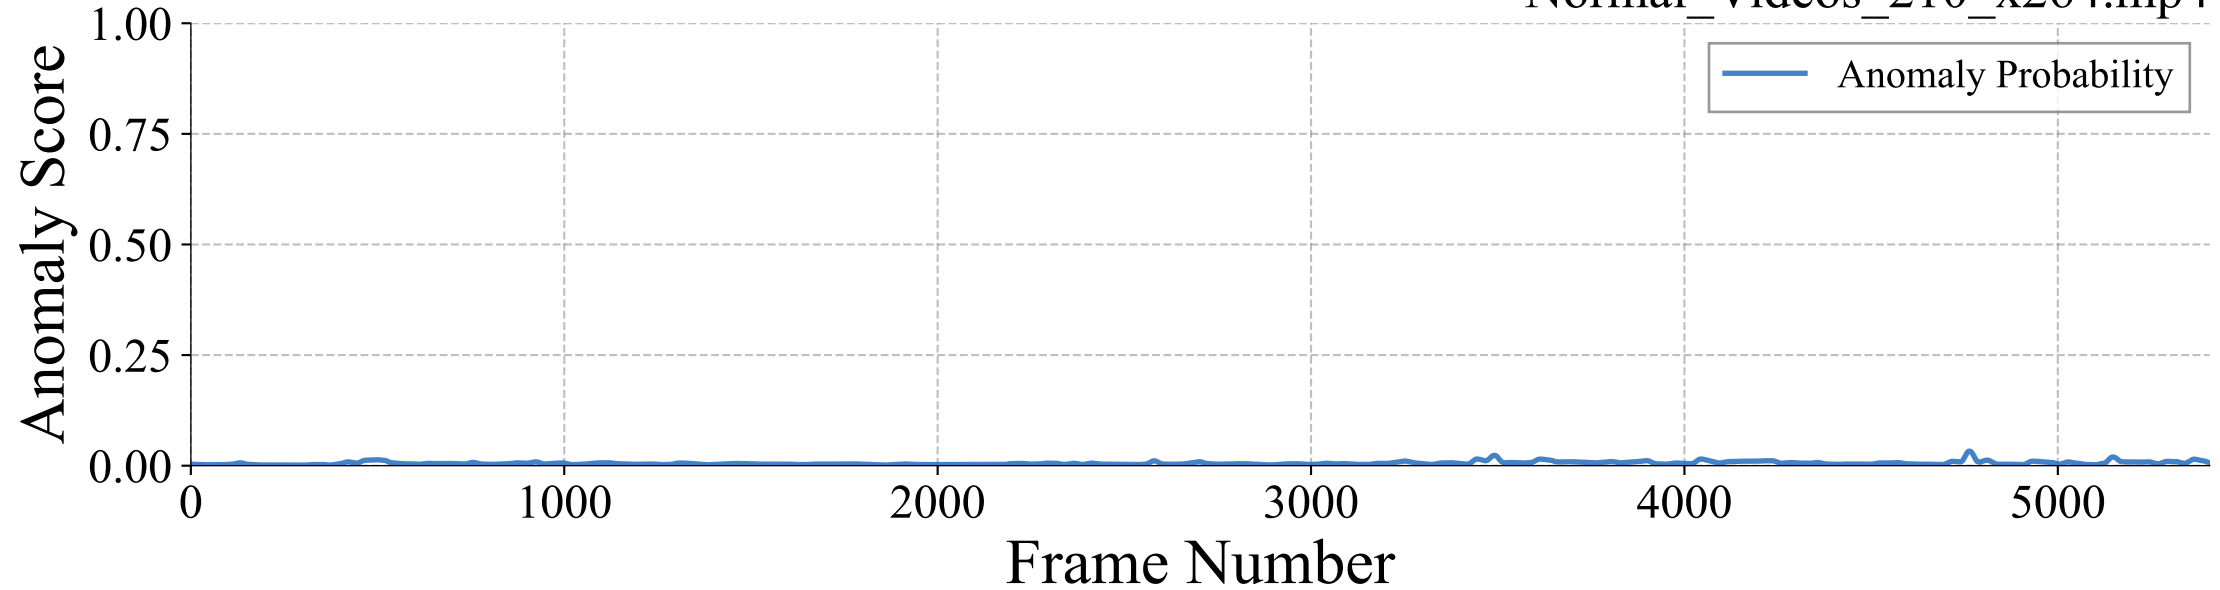

Supplement: supplementary_material [file Normal_Videos_210_x264_probability_visualization.pdf › figures/Normal_Videos_210_x264_probability_visualization.pdf]

Normal\_Videos\_417\_x264.mp4

Anomaly Score

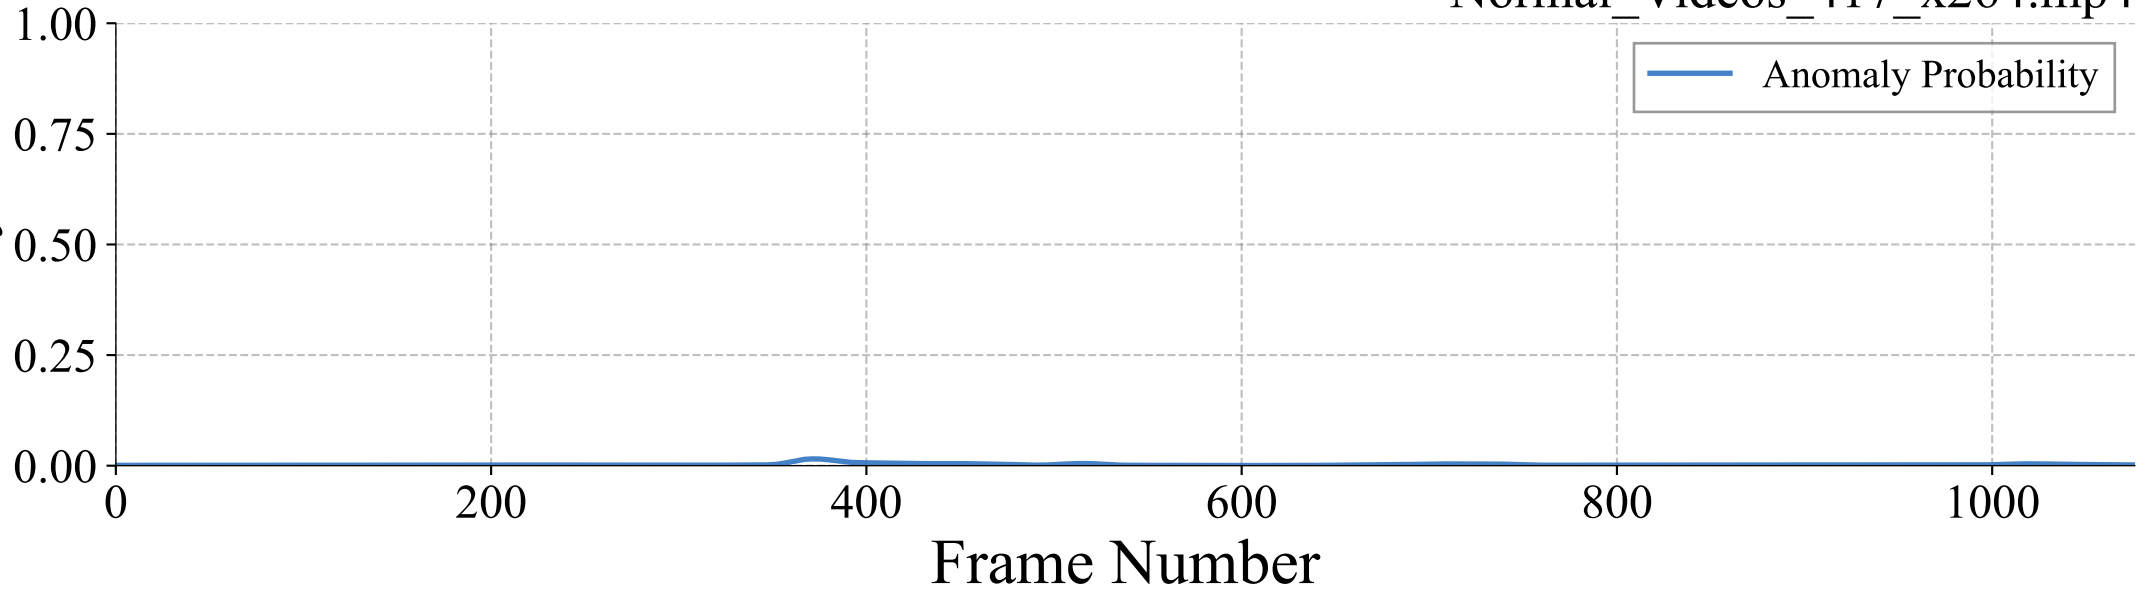

Supplement: supplementary_material [file Normal_Videos_417_x264_probability_visualization.pdf › figures/Normal_Videos_417_x264_probability_visualization.pdf]

Normal\_Videos\_943\_x264.mp4

Anomaly Score

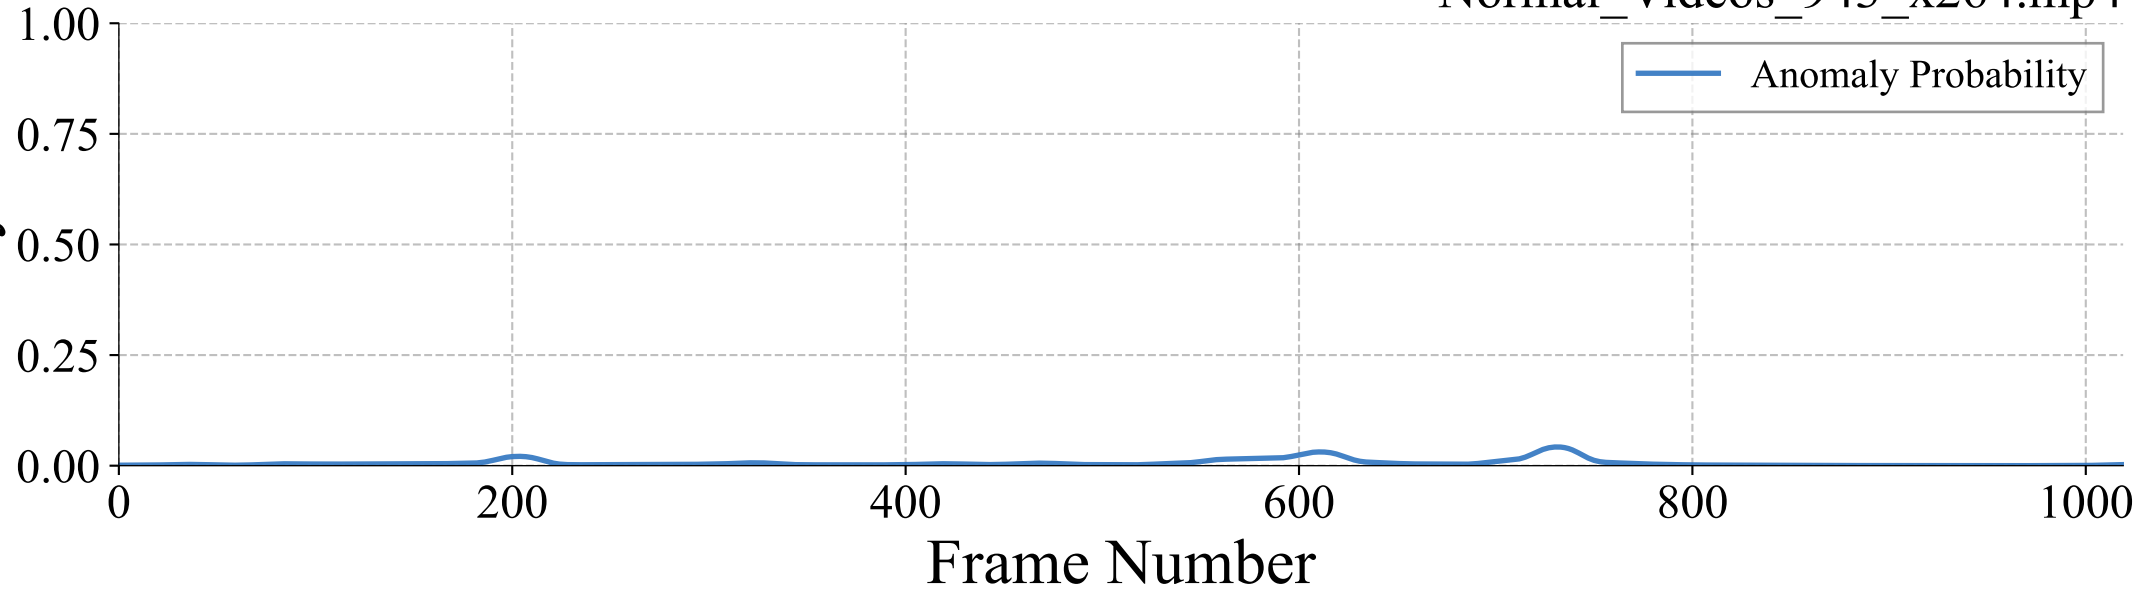

Supplement: supplementary_material [file Normal_Videos_943_x264_probability_visualization.pdf › figures/Normal_Videos_943_x264_probability_visualization.pdf]

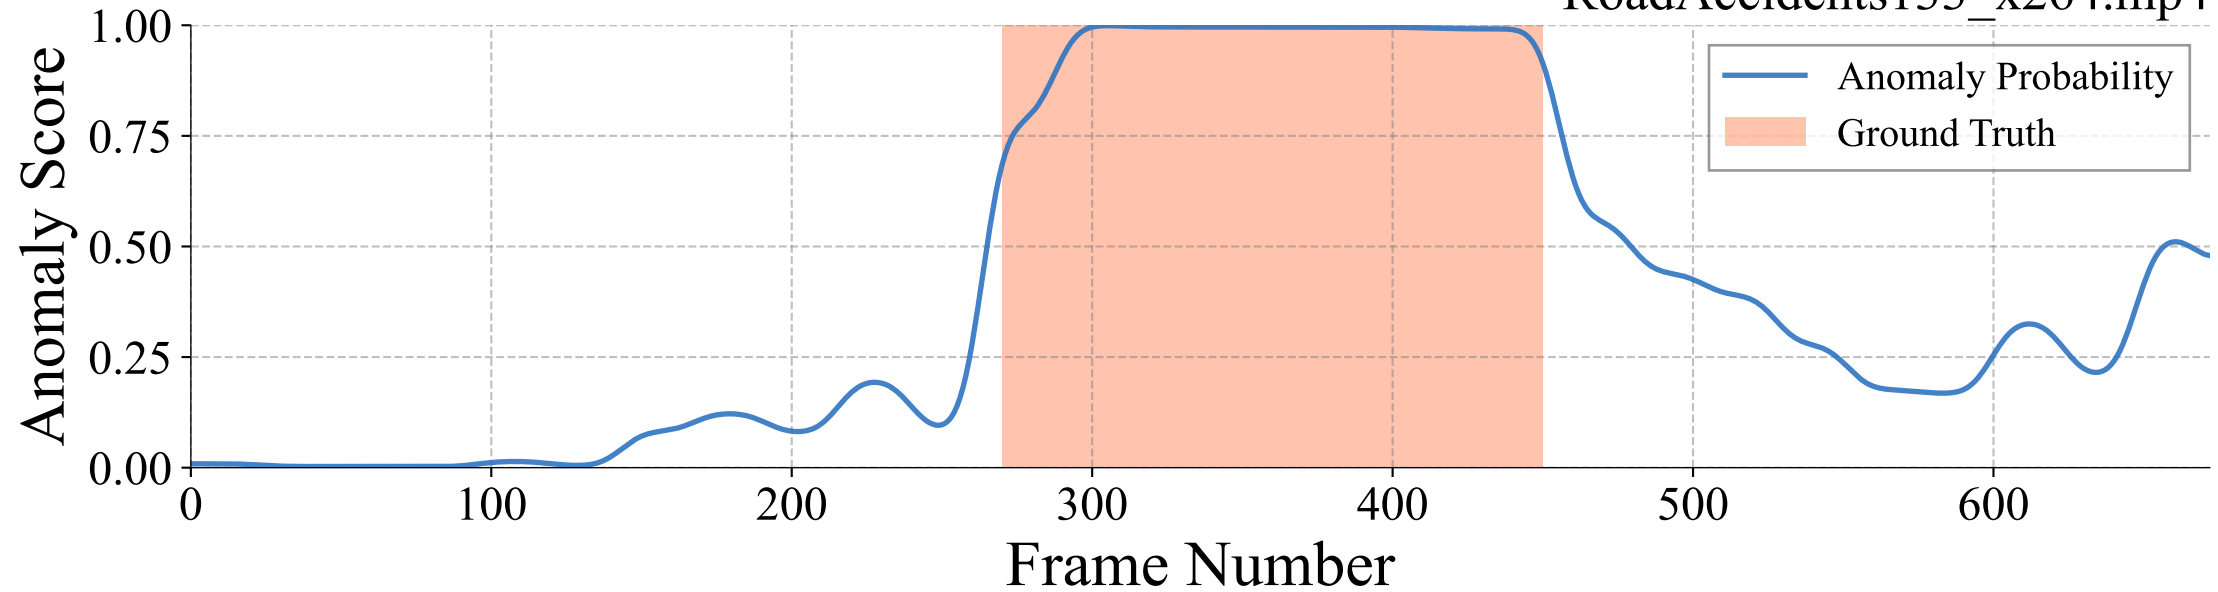

Supplement: supplementary_material [file RoadAccidents133_x264_probability_visualization.pdf › figures/RoadAccidents133_x264_probability_visualization.pdf]

Robbery106\_x264.mp4

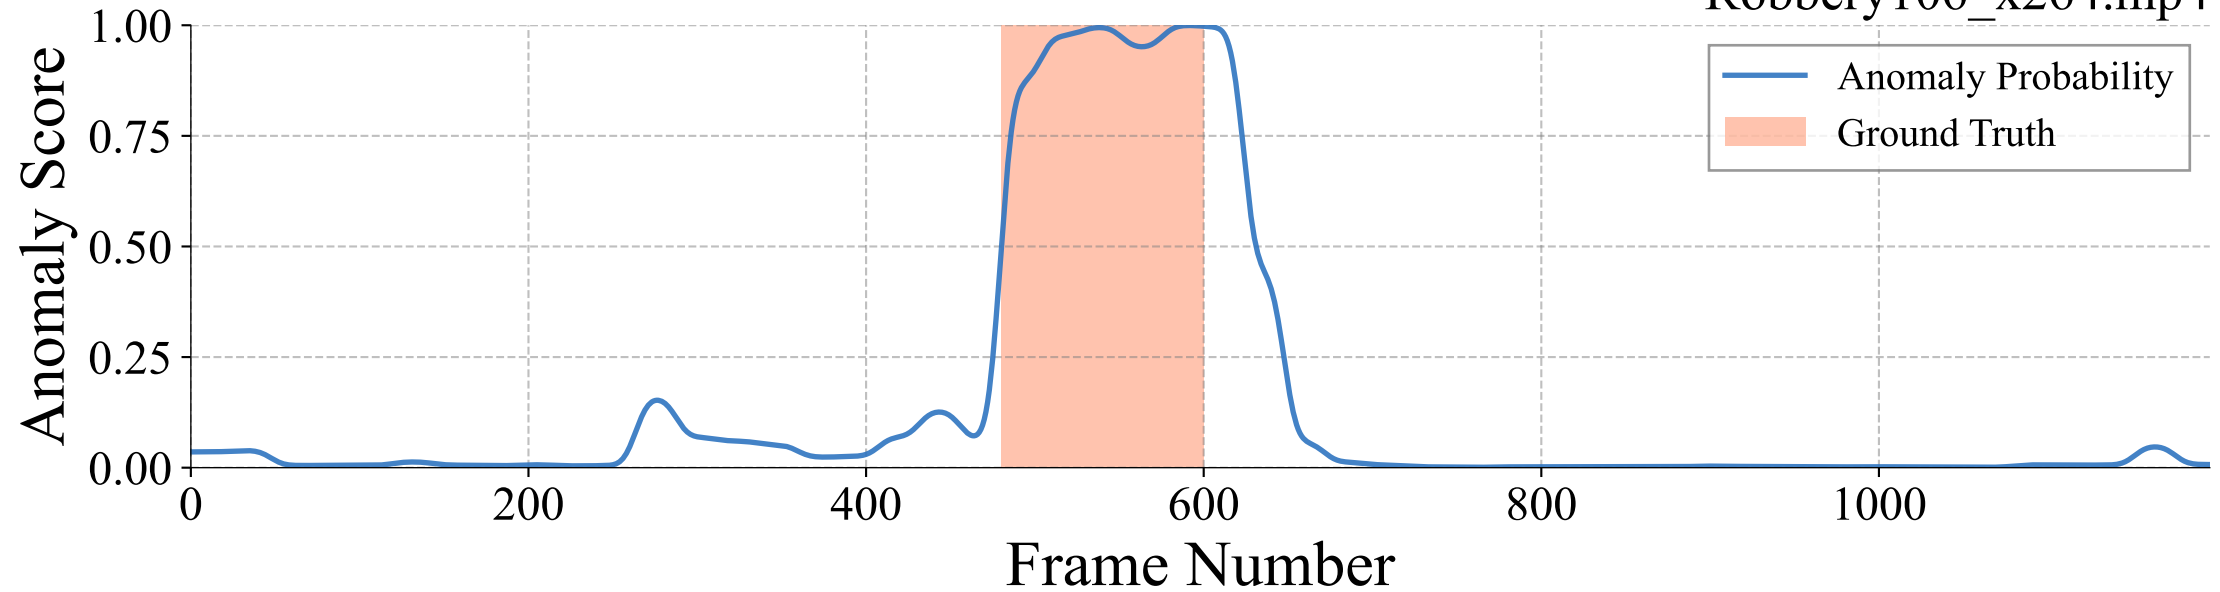

Supplement: supplementary_material [file Robbery106_x264_probability_visualization.pdf › figures/Robbery106_x264_probability_visualization.pdf]

Shooting048\_x264.mp4

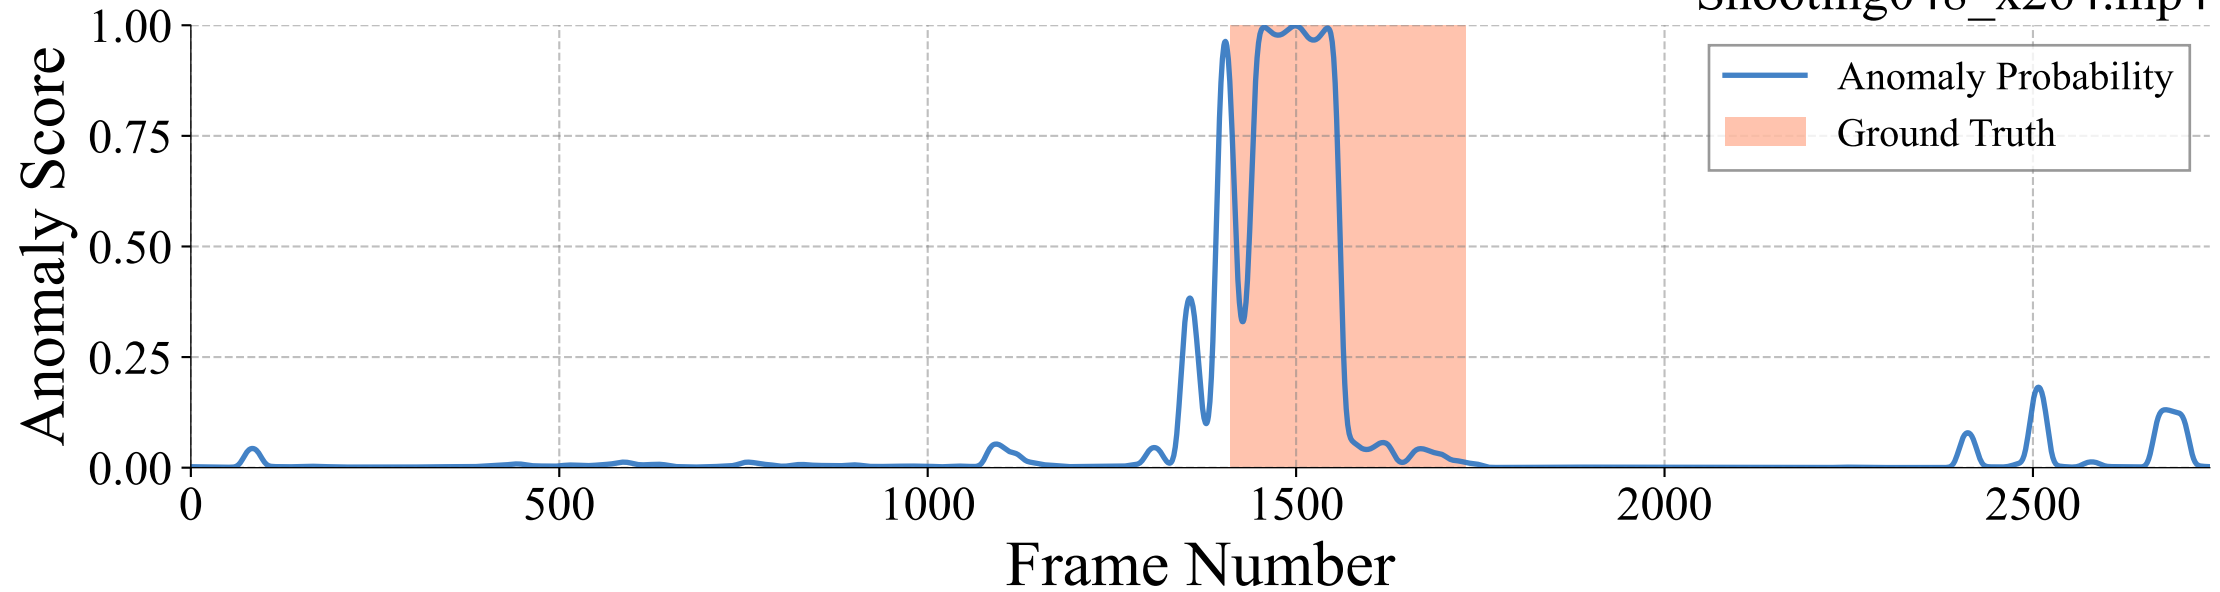

Supplement: supplementary_material [file Shooting048_x264_probability_visualization.pdf › figures/Shooting048_x264_probability_visualization.pdf]

Shoplifting004\_x264.mp4

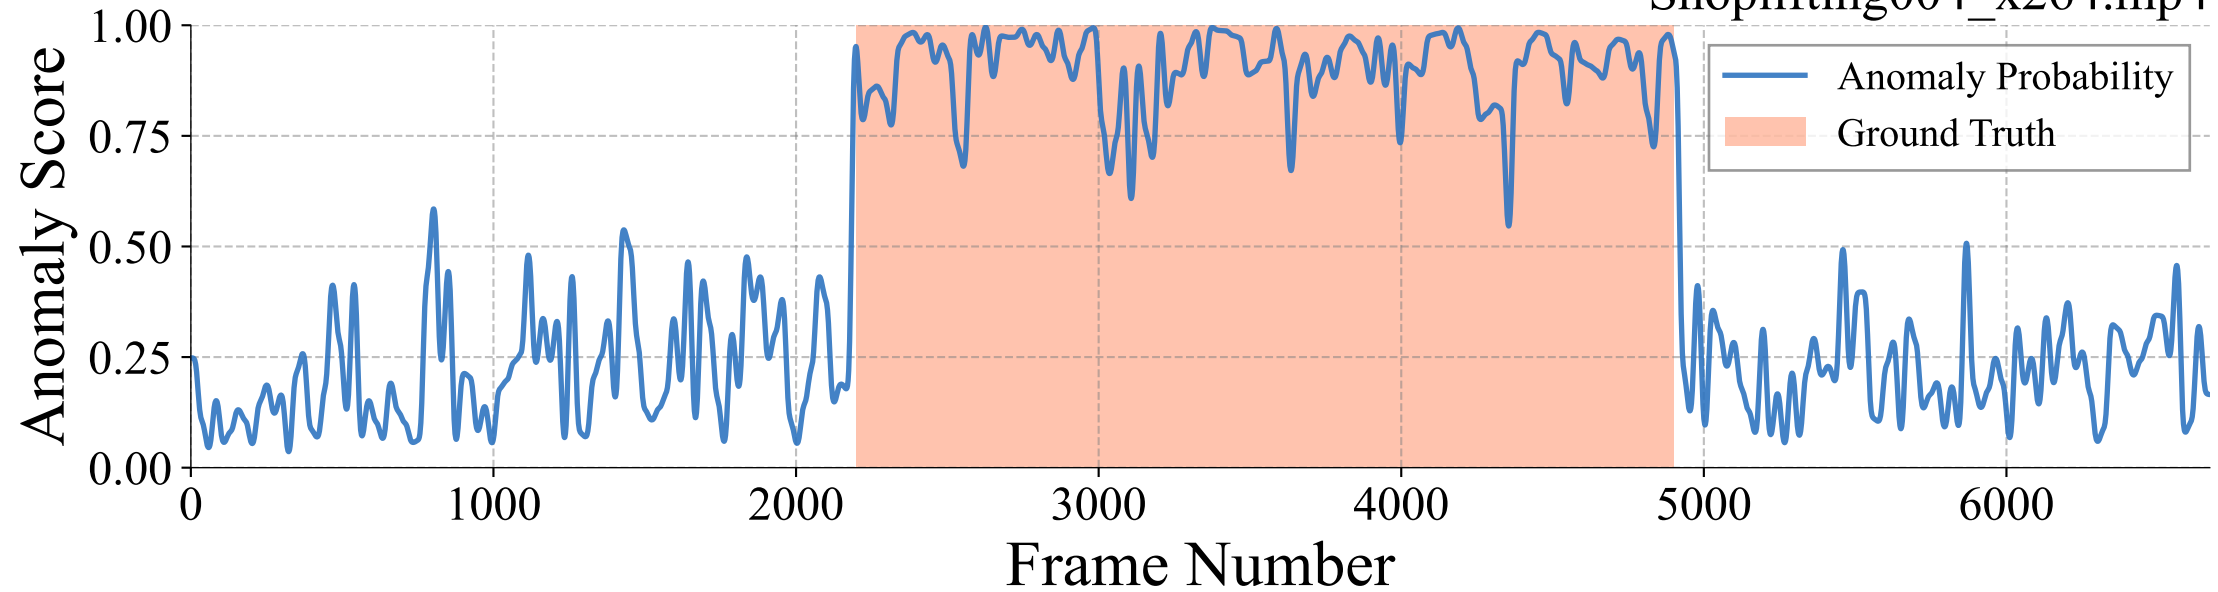

Supplement: supplementary_material [file Shoplifting004_x264_probability_visualization.pdf › figures/Shoplifting004_x264_probability_visualization.pdf]

Shoplifting049\_x264.mp4

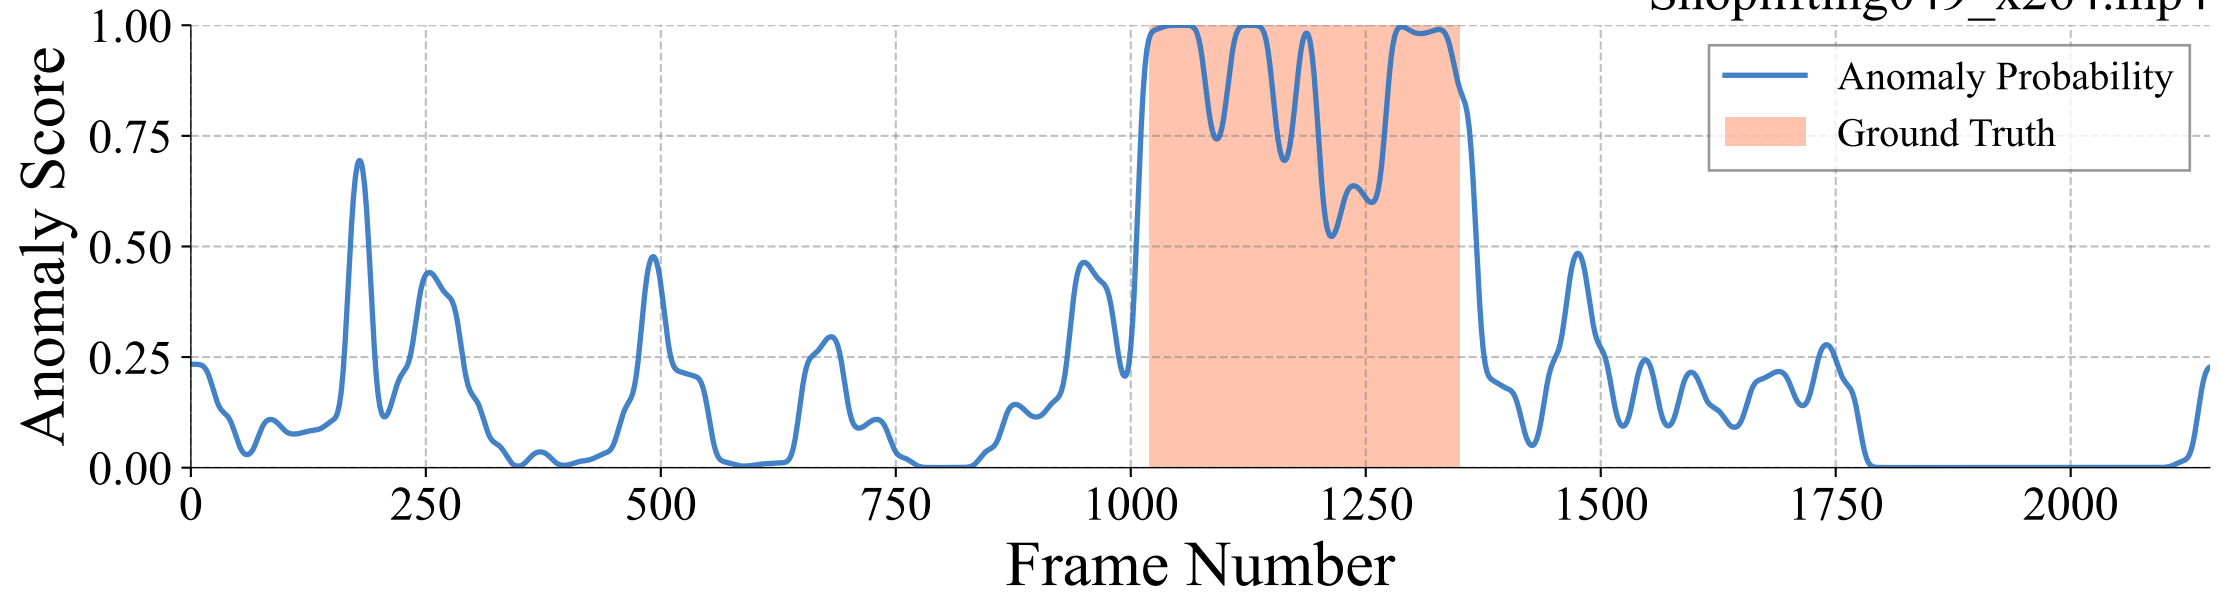

Supplement: supplementary_material [file Shoplifting049_x264_probability_visualization.pdf › figures/Shoplifting049_x264_probability_visualization.pdf]

Stealing062\_x264.mp4

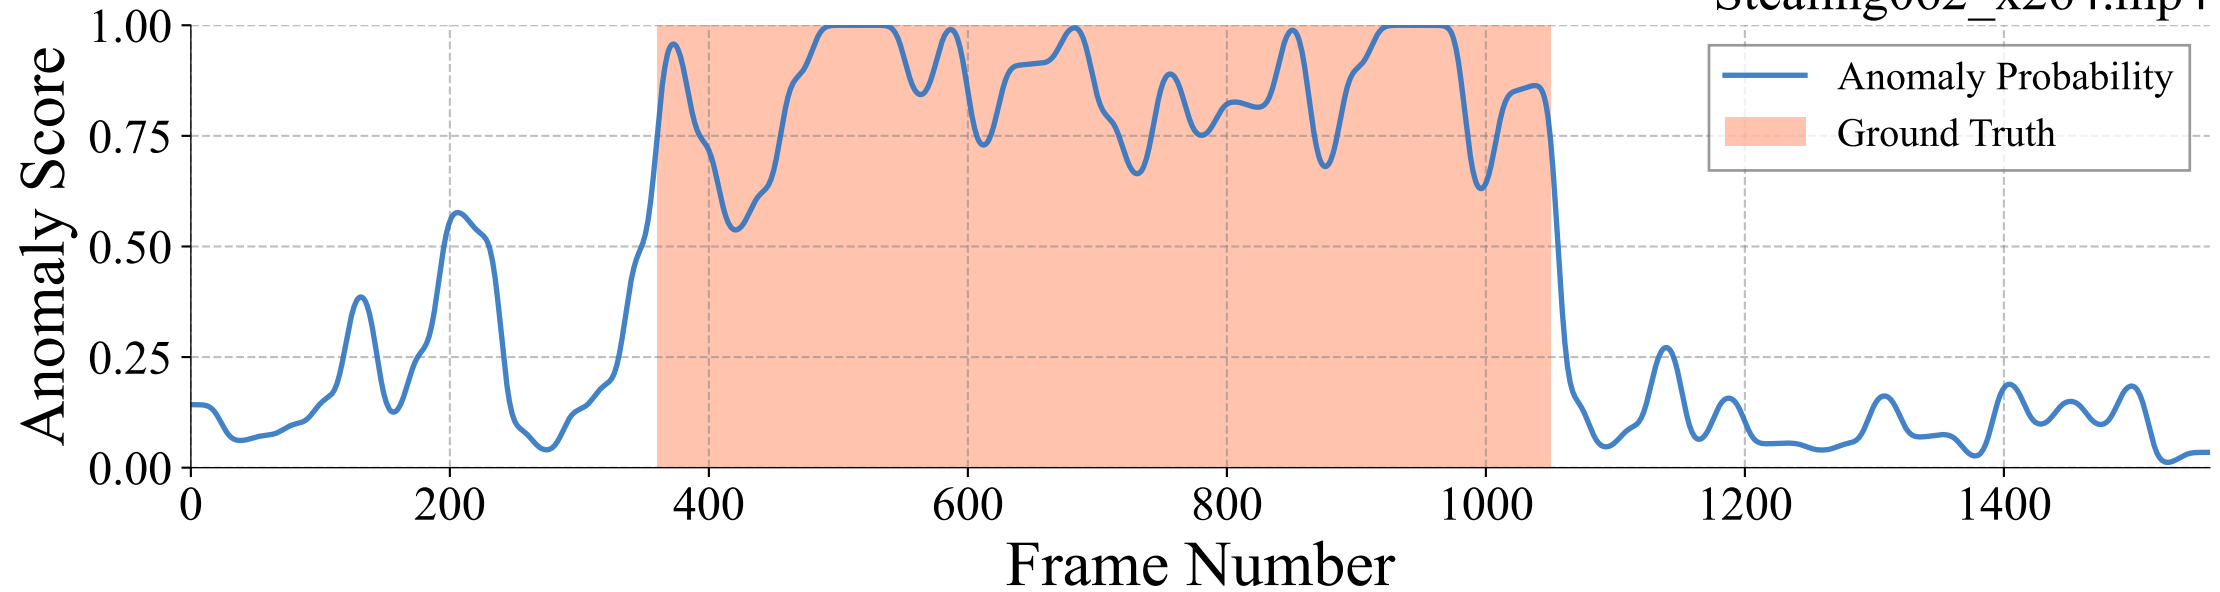

Supplement: supplementary_material [file Stealing062_x264_probability_visualization.pdf › figures/Stealing062_x264_probability_visualization.pdf]

Vandalism017\_x264.mp4

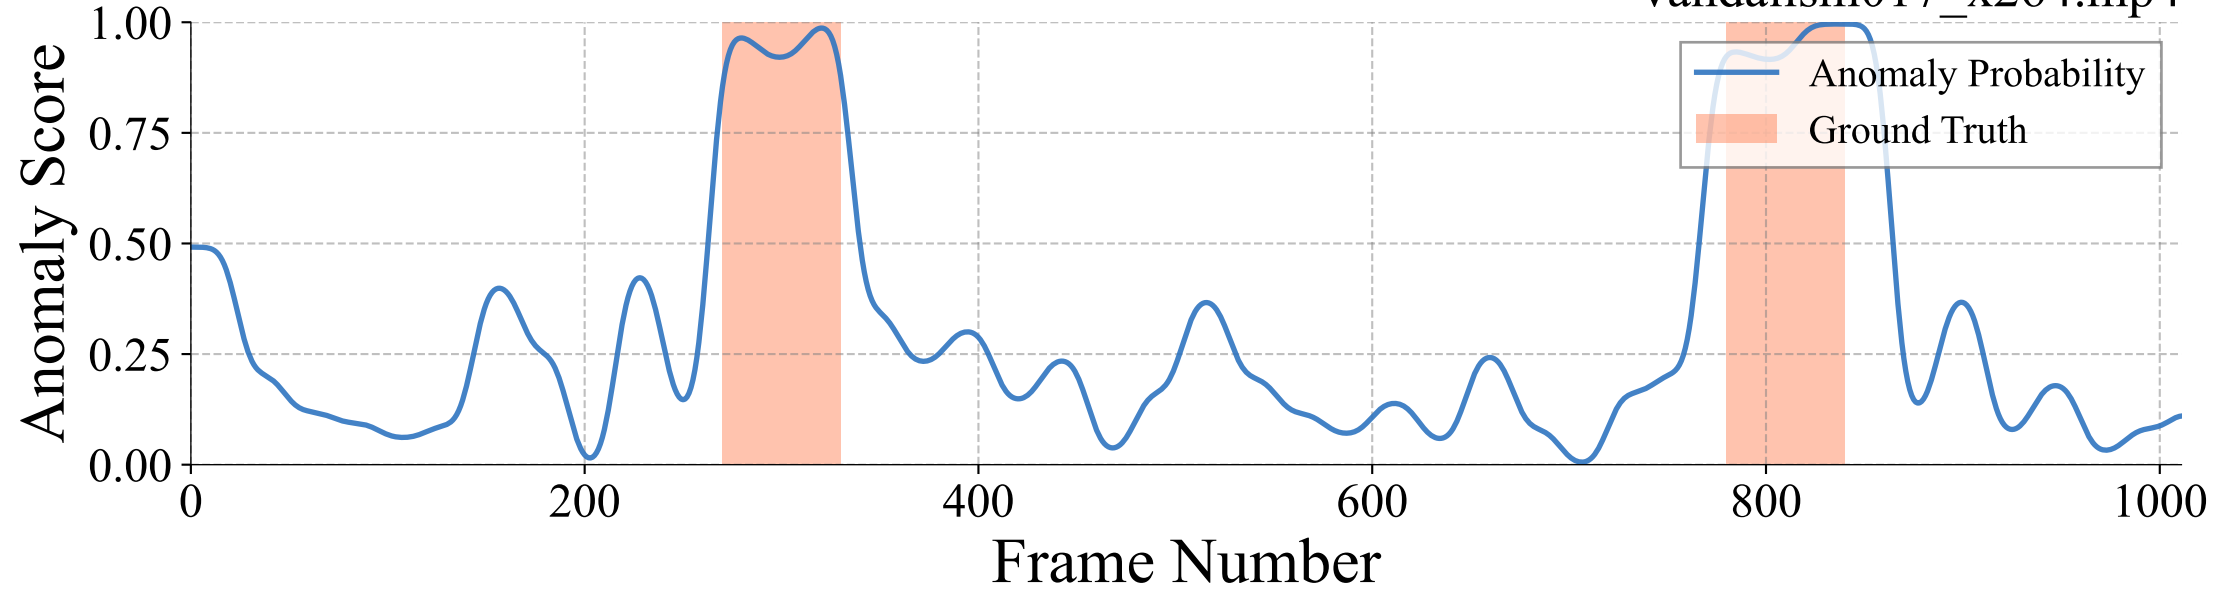

Supplement: supplementary_material [file Vandalism017_x264_probability_visualization.pdf › figures/Vandalism017_x264_probability_visualization.pdf]
